# Supplementary material for: Stereoassembly of ultrasmall Rh-decorated zeolite imidazolate framework–MXene heterostructures for boosted methanol oxidation reaction
Source: Royal Society of Chemistry journal article supplement (doi:10.1039/d2ta08709j), 2023-01-01
Supplement: d2ta08709j1.pdf [file d2ta08709j1.pdf]

Supporting Information for

**Stereoassembly of ultrasmall Rh-decorated zeolite imidazolate  
framework-MXene heterostructures for boosted methanol oxidation  
reaction**

Jinlong Qin,<sup>a</sup> Huajie Huang,<sup>\*a</sup> Jian Zhang,<sup>b</sup> Fengyi Zhu,<sup>a</sup> Lang Luo,<sup>a</sup> Chi Zhang,<sup>a</sup> Lu

Yang,<sup>a</sup> Quanguo Jiang,<sup>a</sup> Haiyan He<sup>\*a</sup>

<sup>a</sup>College of Mechanics and Materials, Hohai University, Nanjing 210098, China

<sup>b</sup>New Energy Technology Engineering Lab of Jiangsu Province, College of Science,  
Nanjing University of Posts & Telecommunications (NUPT), Nanjing 210023, China

E-mail: huanghuajie@hhu.edu.cn, he.haiyan@hhu.edu.cn

**Supplementary Results**

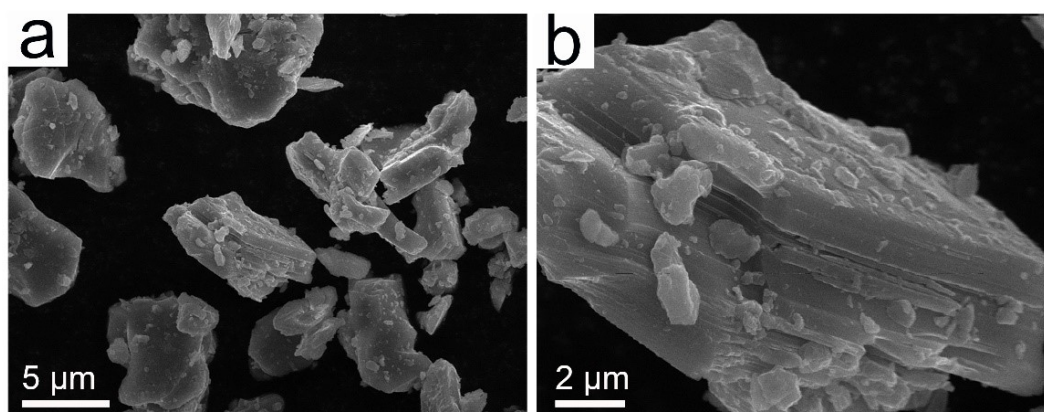

**Fig. S1** Representative SEM images of bulk Ti<sub>3</sub>AlC<sub>2</sub> at different magnifications.

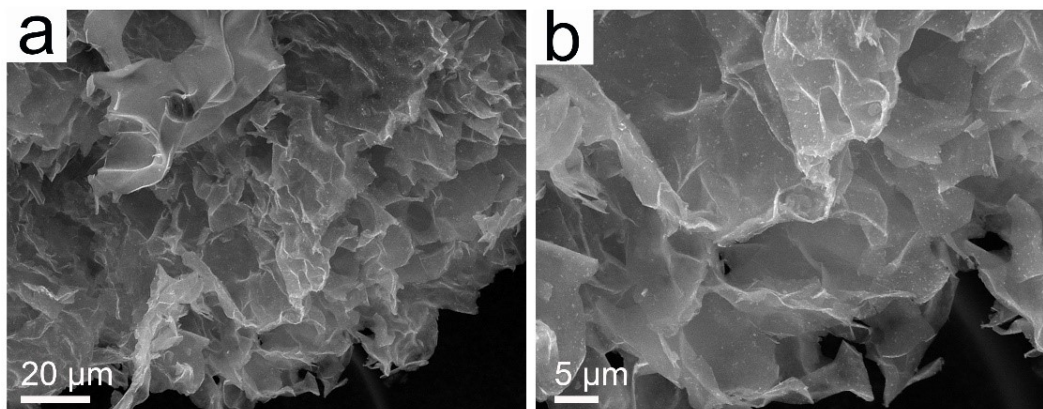

**Fig. S2** Representative SEM images of 2D exfoliated  $\text{Ti}_3\text{C}_2\text{T}_x$  nanosheets at different magnifications.

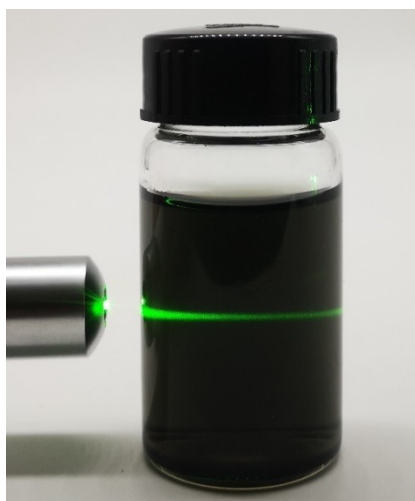

**Fig. S3** The Tyndall phenomenon of the as-obtained  $\text{Ti}_3\text{C}_2\text{T}_x$  MXene solution.

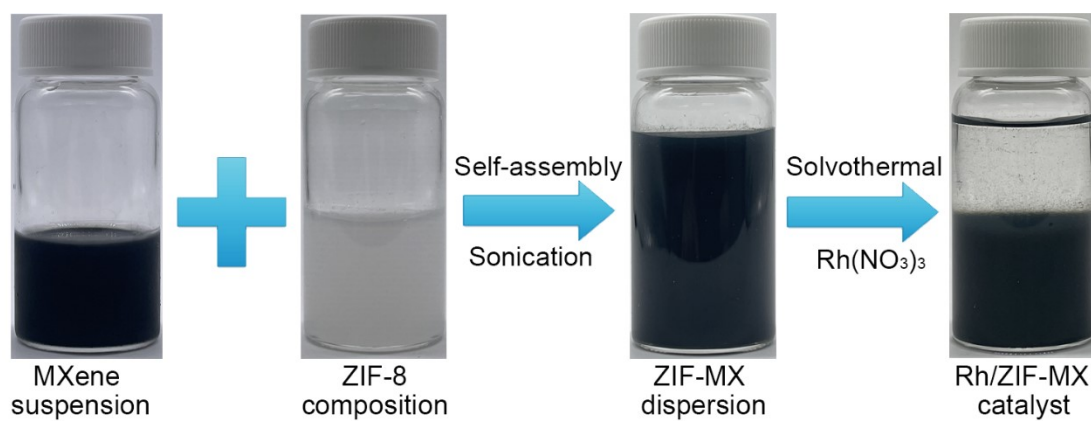

**Fig. S4** The synthetic processes for the Rh/ZIF-MX catalyst.

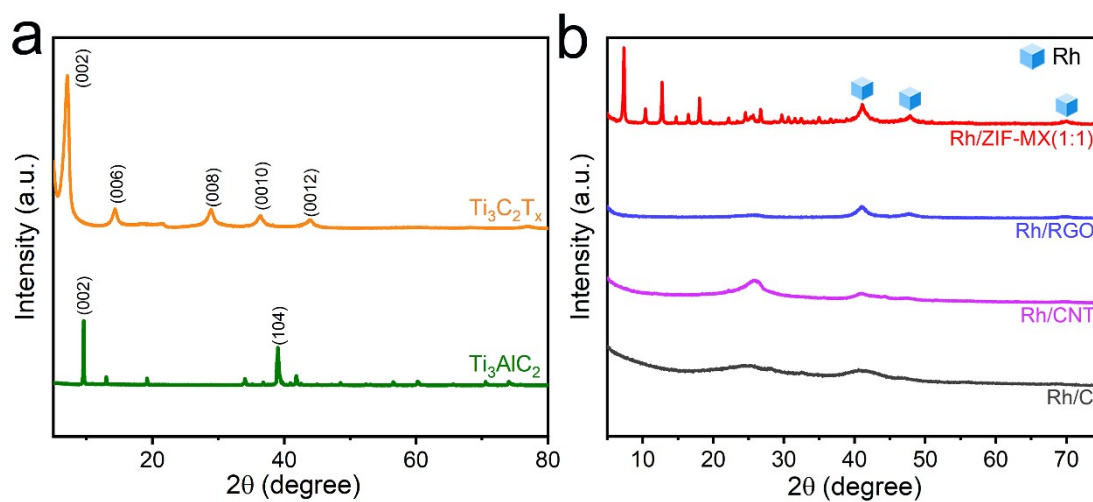

**Fig. S5** XRD patterns of (a) the bulk  $\text{Ti}_3\text{AlC}_2$  and  $\text{Ti}_3\text{C}_2\text{T}_x$  nanosheets. (b) XRD patterns of the Rh/ZIF-MX(1:1), Rh/RGO, Rh/CNT and Rh/C samples.

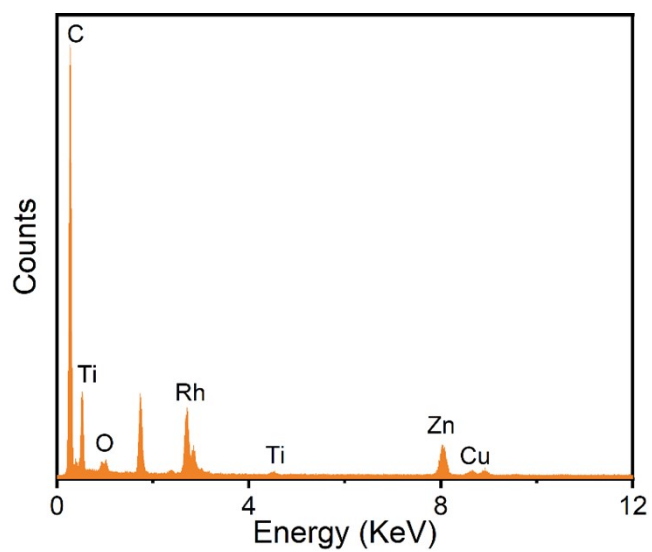

**Fig. S6** EDX spectrum of the Rh/ZIF-MX catalyst. The Cu signals were also detected because the sample was held on a Cu grid.

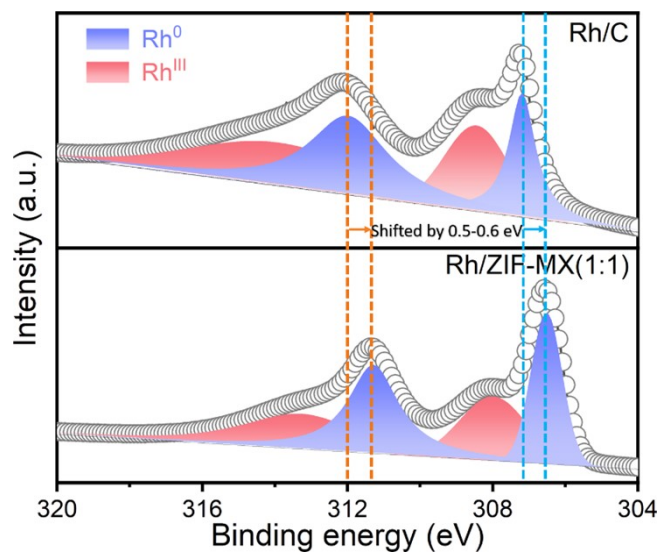

**Fig. S7** Comparison of the binding energies for Rh 3d spectra of the Rh/ZIF-MX and Rh/C samples.

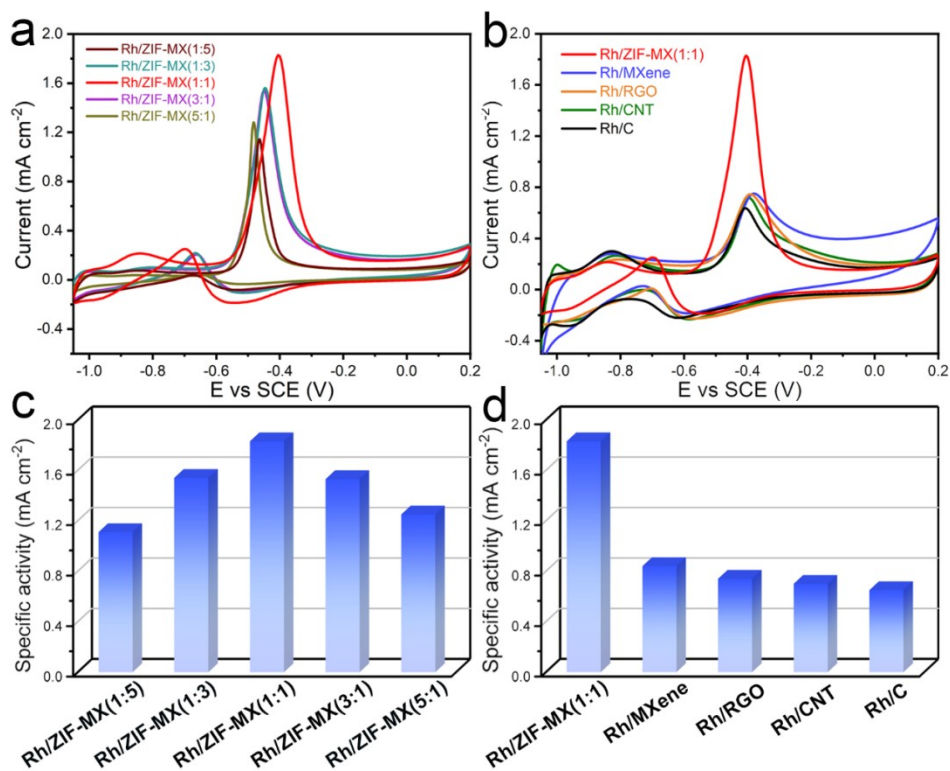

**Fig. S8** The ECSA-normalized CV curves of the (a) Rh/ZIF-MX catalysts with different ZIF/MXene ratios and (b) Rh/MXene, Rh/RGO, Rh/CNT and Rh/C in 1 mol L<sup>-1</sup> KOH with 1 mol L<sup>-1</sup> CH<sub>3</sub>OH solution at 50 mV s<sup>-1</sup>. (c-d) Specific activities of various catalysts.

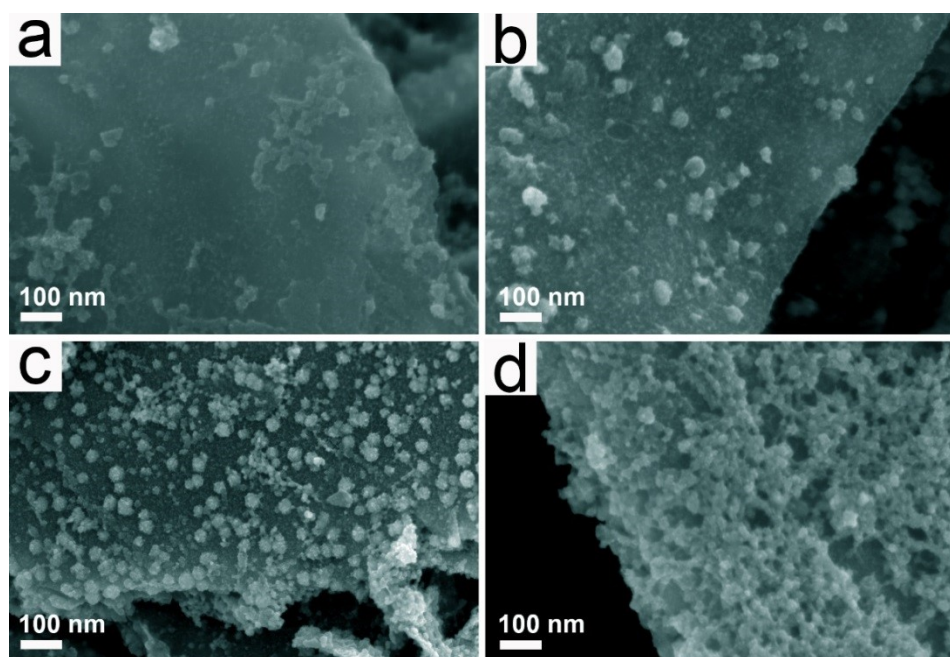

**Fig. S9** The FE-SEM images of the (a) Rh/ZIF-MX(1:5), (b) Rh/ZIF-MX(1:3), (c) Rh/ZIF-

MX(3:1) and (d) Rh/ZIF-MX(5:1) samples.

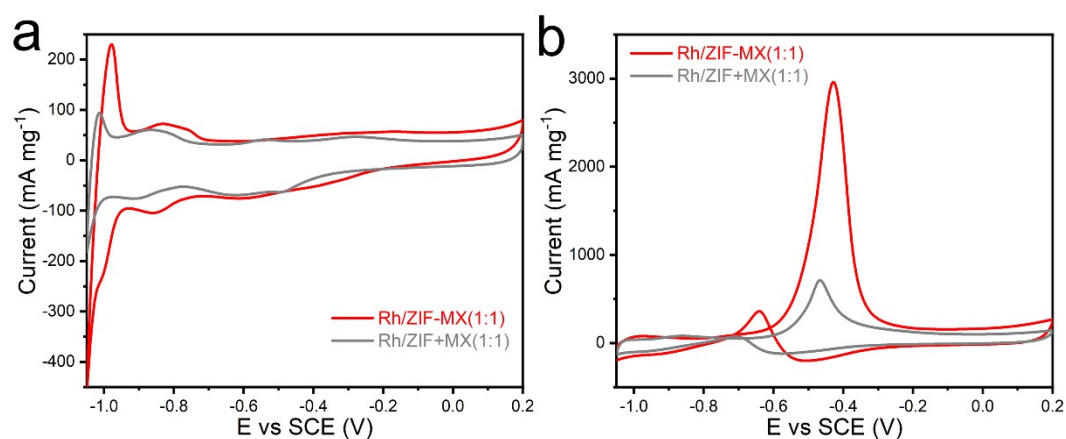

**Fig. S10** The CV curves of the Rh/ZIF-MX(1:1) and Rh/ZIF+MX(1:1) electrodes in (a) 1 mol L<sup>-1</sup> KOH and (b) 1 mol L<sup>-1</sup> KOH with 1 mol L<sup>-1</sup> CH<sub>3</sub>OH solution at 50 mV s<sup>-1</sup>.

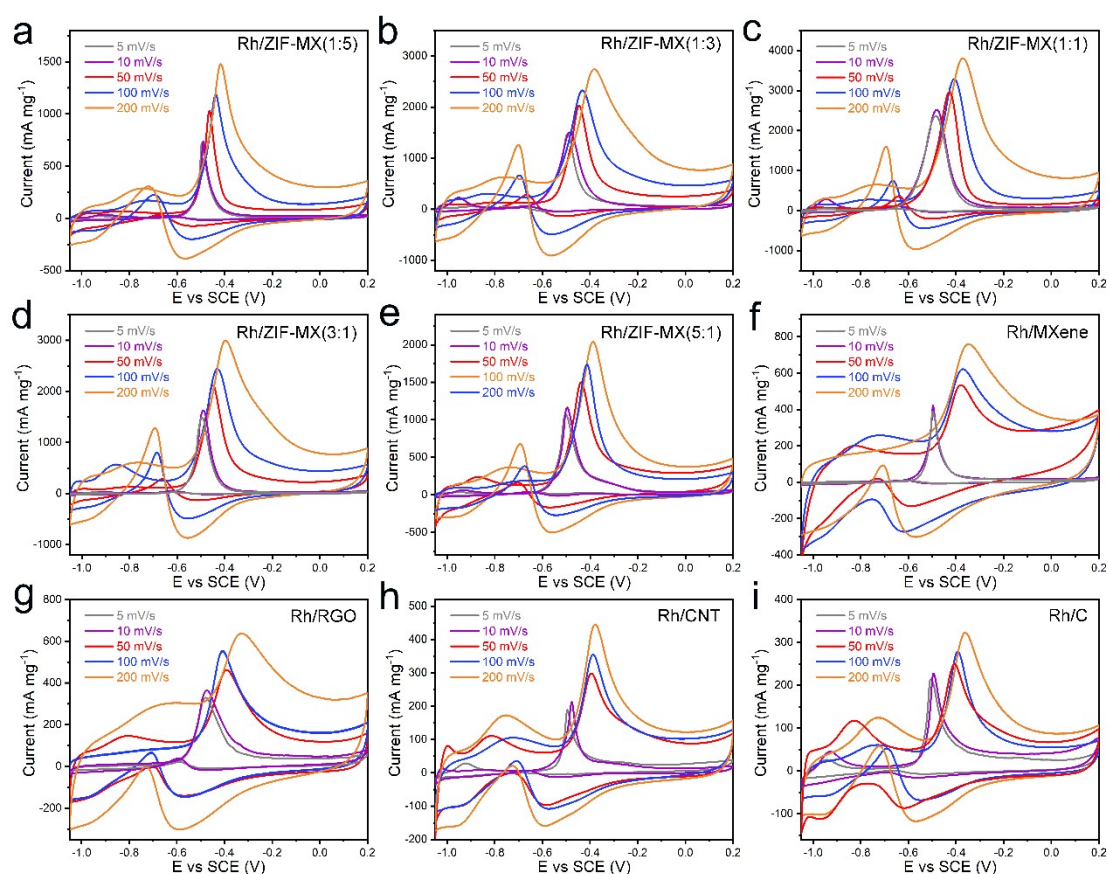

**Fig. S11** The CV curves of the (a) Rh/ZIF-MX(1:5), (b) Rh/ZIF-MX(1:3), (c) Rh/ZIF-MX(1:1), (d) Rh/ZIF-MX(3:1), (e) Rh/ZIF-MX(5:1), (f) Rh/MXene, (g) Rh/RGO, (h) Rh/CNT and (i) Rh/C catalysts at different scan rates.

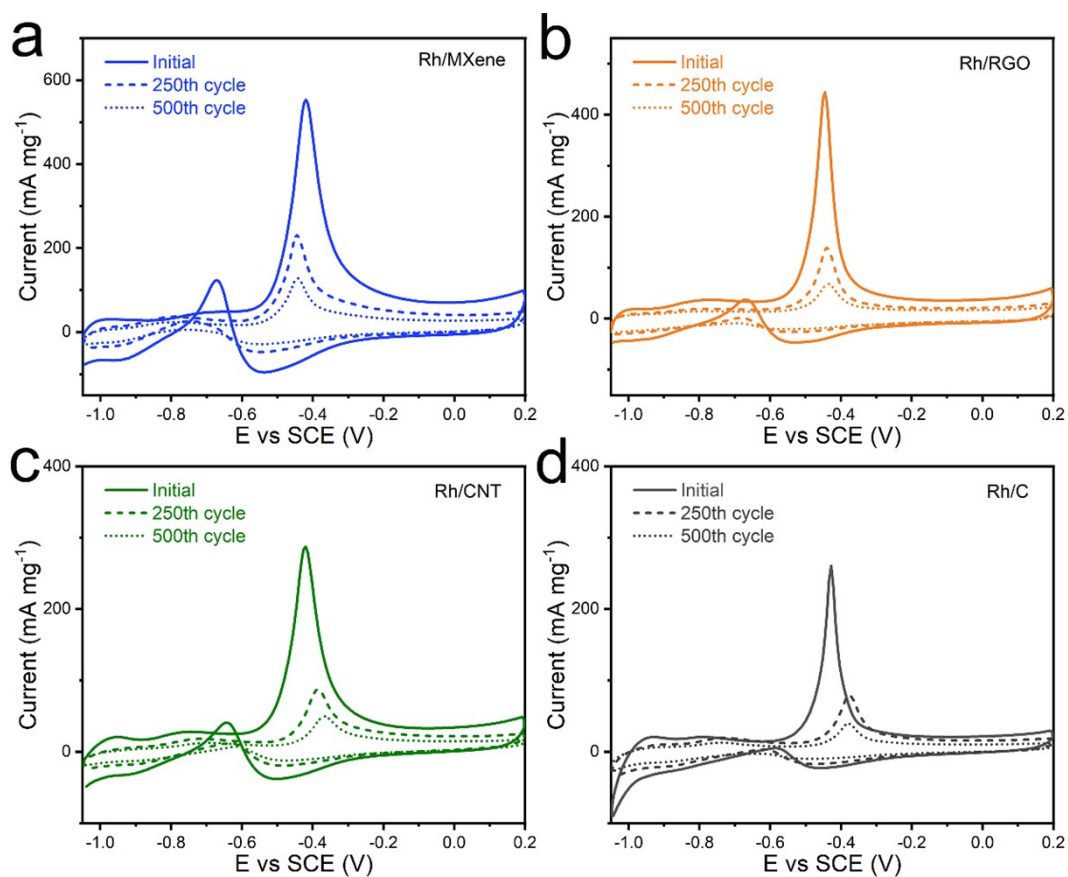

**Fig. S12** The CV curves of (a) Rh/MXene, (b) Rh/RGO, (c) Rh/CNT and (d) Rh/C before and after 500 cycles.

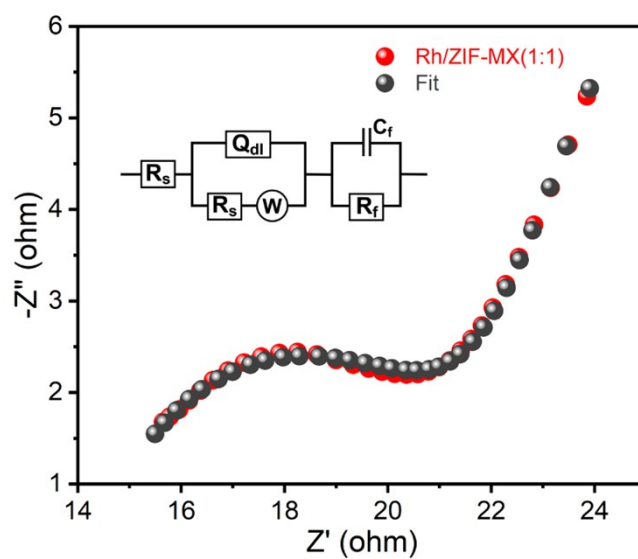

**Fig. S13** Nyquist plots of EIS and fitting curve of the Rh/ZIF-MX(1:1) electrode.

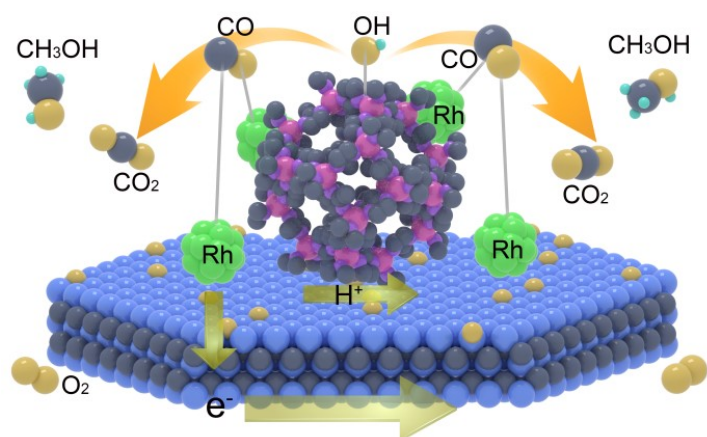

**Fig. S14** Schematic diagram of the electrocatalytic processes on the Rh/ZIF-MX electrode.

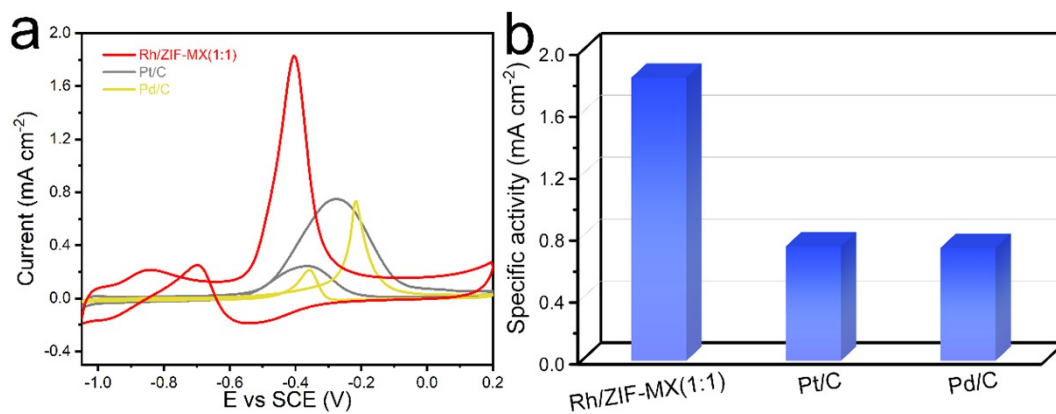

**Fig. S15** The ECSA-normalized CV curves of (a) Rh/ZIF-MX(1:1), Pt/C, and Pd/C in 1 mol L<sup>-1</sup> KOH with 1 mol L<sup>-1</sup> CH<sub>3</sub>OH solution at 50 mV s<sup>-1</sup>. (b) Specific activities of these three catalysts.



**Table S1.** Compiled study comparing CV results for different catalysts.

| Electrode      | ECSA<br>(m <sup>2</sup> g <sup>-1</sup> ) | Mass activity<br>(mA mg <sup>-1</sup> ) | Specific activity<br>(mA cm <sup>-2</sup> ) |
|----------------|-------------------------------------------|-----------------------------------------|---------------------------------------------|
| Rh/ZIF-MX(1:5) | 90.2                                      | 1000.3                                  | 1.11                                        |
| Rh/ZIF-MX(1:3) | 130.1                                     | 2000.5                                  | 1.54                                        |
| Rh/ZIF-MX(1:1) | 161.5                                     | 2955.1                                  | 1.83                                        |
| Rh/ZIF-MX(3:1) | 137.8                                     | 2109.8                                  | 1.53                                        |
| Rh/ZIF-MX(5:1) | 116.4                                     | 1450.3                                  | 1.25                                        |
| Rh/MXene       | 71.2                                      | 600.1                                   | 0.84                                        |
| Rh/RGO         | 62.1                                      | 460.6                                   | 0.74                                        |
| Rh/CNT         | 41.7                                      | 293.1                                   | 0.70                                        |
| Rh/C           | 39.2                                      | 255.2                                   | 0.65                                        |
| Pt/C           | 58.8                                      | 425.8                                   | 0.72                                        |
| Pd/C           | 58.4                                      | 430.8                                   | 0.74                                        |

**Table S2.** Comparison of methanol oxidation behavior for the Rh/ZIF-MX catalyst and various state-of-the-art Rh-based electrocatalysts.

| Catalyst                                                | ECSA<br>(m <sup>2</sup> g <sup>-1</sup> ) | Mass activity<br>(mA mg <sup>-1</sup> ) | Electrolyte                                                 | Ref.      |
|---------------------------------------------------------|-------------------------------------------|-----------------------------------------|-------------------------------------------------------------|-----------|
| Rh/ZIF-MX                                               | 161.5                                     | 2955.1                                  | 1 mol L <sup>-1</sup> KOH+<br>1 mol L <sup>-1</sup> CH3OH   | This work |
| Rh/(MoS <sub>2</sub> ) <sub>5</sub> -(RGO) <sub>5</sub> | 95.5                                      | 1502                                    | 1 mol L <sup>-1</sup> KOH+<br>1 mol L <sup>-1</sup> CH3OH   | S1        |
| Rh/CNT-RGO                                              | 123.8                                     | 1228.5                                  | 1 mol L <sup>-1</sup> KOH+<br>1 mol L <sup>-1</sup> CH3OH   | S2        |
| Rh/carbon nanohorns                                     | 102.5                                     | 784.0                                   | 1 mol L <sup>-1</sup> KOH+<br>1 mol L <sup>-1</sup> CH3OH   | S3        |
| Rh/Ti <sub>3</sub> C <sub>2</sub> T <sub>x</sub>        | 71.6                                      | 600.0                                   | 1 mol L <sup>-1</sup> KOH+<br>1 mol L <sup>-1</sup> CH3OH   | S4        |
| Rh/graphene aerogel                                     | 79.6                                      | 499                                     | 1 mol L <sup>-1</sup> KOH+<br>1 mol L <sup>-1</sup> CH3OH   | S5        |
| Rh nanosheets                                           | 73.12                                     | 333                                     | 1 mol L <sup>-1</sup> KOH+<br>0.5 mol L <sup>-1</sup> CH3OH | S6        |
| Rh nanotubes                                            | 60.9                                      | 325                                     | 1 mol L <sup>-1</sup> KOH+<br>1 mol L <sup>-1</sup> CH3OH   | S7        |
| Hollow Rh spheres                                       | 50.7                                      | 292                                     | 1 mol L <sup>-1</sup> KOH+<br>1 mol L <sup>-1</sup> CH3OH   | S8        |
| Rh nanosheets/RGO                                       | 48.7                                      | 264                                     | 1 mol L <sup>-1</sup> KOH+<br>1 mol L <sup>-1</sup> CH3OH   | S9        |
| Rh nanodendrites                                        | 43.4                                      | 255.6                                   | 1 mol L <sup>-1</sup> KOH+<br>1 mol L <sup>-1</sup> CH3OH   | S10       |

**Table S3.** The charge-transfer resistances (R<sub>ct</sub>) of different electrodes.

| Electrode      | R <sub>ct</sub> |           |
|----------------|-----------------|-----------|
|                | Value (ohm)     | Error (%) |
| Rh/ZIF-MX(1:1) | 8.1             | 1.2       |
| Rh/MXene       | 11.6            | 1.6       |
| Rh/RGO         | 23.1            | 1.9       |
| Rh/CNT         | 36.8            | 1.6       |
| Rh/C           | 4850.0          | 3.2       |

## Reference

- [S1] Q. Zhang, Y. Li, H. He and H. Huang, *ACS Sustainable Chem. Eng.*, 2022, **10**, 8940-8948.
- [S2] Y. Li, Y. Chen, J. Qin, J. Chen, Y. Zhao, Y. Xie, H. He and H. Huang, *ChemNanoMat*, 2022, **8**, e202200176.
- [S3] X. Guo, Q. Zhang, Y. Li, Y. Chen, L. Yang, H. He, X. Xu and H. Huang, *Rare Met.*, 2022, **41**, 2108–2117.
- [S4] J. Qin, H. Huang, Y. Xie, S. Pan, Y. Chen, L. Yang, Q. Jiang and H. He, *Ceram. Int.*, 2022, **48**, 15327-15333.
- [S5] Y. Yang, H. Huang, C. Yang and H. He, *ACS Appl. Energy Mater.*, 2021, **4**, 376-383.
- [S6] J. Zhu, S. Chen, Q. Xue, F. Li, H. Yao, L. Xu and Y. Chen, *Appl. Catal. B*, 2020, **264**, 118520.
- [S7] S. Wang, S. Liu, Z. Wang, Z. Dai, H. Yu, Y. Xu, X. Li, L. Wang and H. Wang, *J. Mater. Chem. A*, 2021, **9**, 4744-4750.
- [S8] Y. Kang, Q. Xue, Y. Zhao, X. Li, P. Jin and Y. Chen, *Small*, 2018, **18**, e1801239.
- [S9] Y. Kang, Q. Xue, P. Jin, J. Jiang, J. Zeng and Y. Chen, *ACS Sustainable Chem. Eng.*, 2017, **5**, 10156-10162.
- [S10] Y. Kang, F. Li, S. Li, P. Jin, J. Zeng, J. Jiang and Y. Chen, *Nano Res.*, 2016, **9**, 3893-3902.
